# Supplementary material
Source: Springer Nature journal article supplement (https://www.springermedizin.de/resource/supplementary/12931_2010_1057_MOESM7_ESM.pdf/9425540)

**A** Normoxia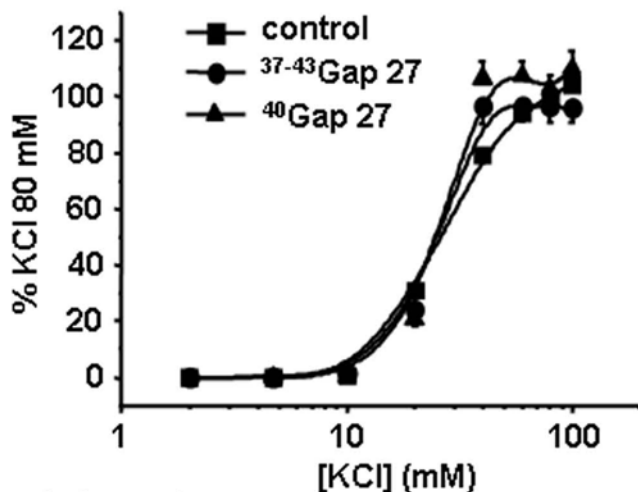**B** Chronic hypoxia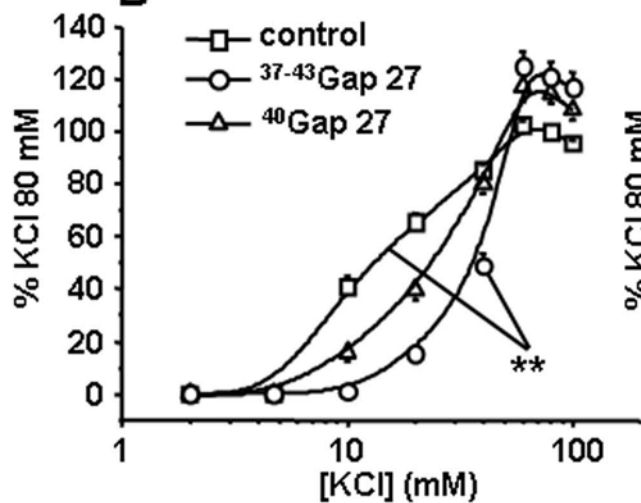**C**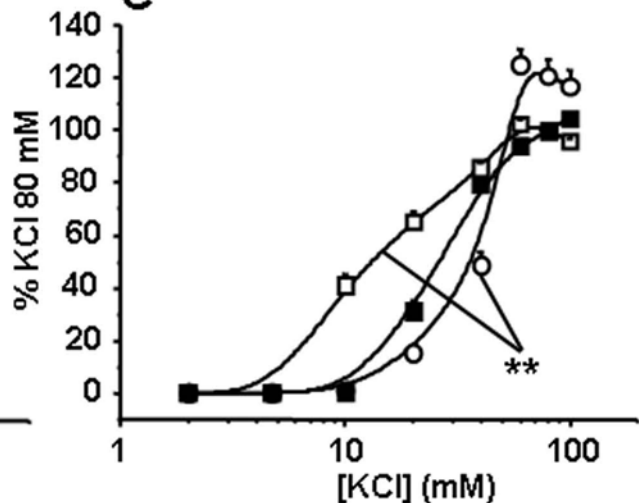**D** Monocrotaline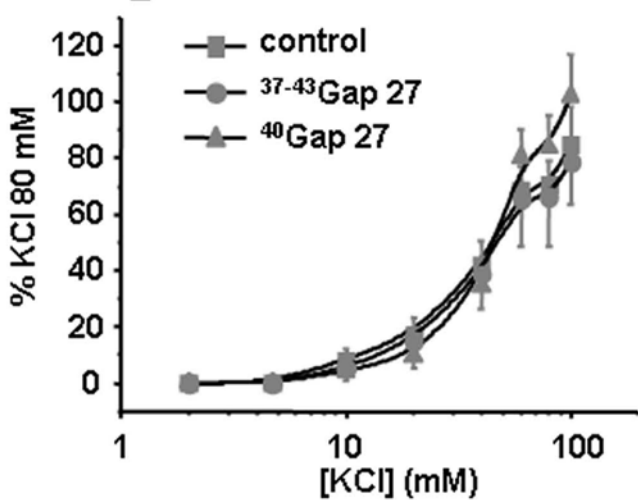

Supplement: MOESM7 [file 9425540]
